# Supplementary material for: Rapid, Sensitive, and Sustainable Reversed-Phase HPTLC Method in Comparison to the Normal-Phase HPTLC for the Determination of Pterostilbene in Capsule Dosage Form
Source: MDPI journal article supplement (doi:10.3390/pr9081305), 2021-07-28
Supplement: s1 [file s1]

## Supplementary Materials

**Table S1.** Chromatographic conditions and instrumentations utilized for the determination of pterostilbene (PT) for the routine normal-phase HPTLC and the sustainable reversed-phase HPTLC techniques.

| Chromatographic conditions/instrumentation | Routine normal-phase HPTLC                                                                                 | Sustainable reversed-phase HPTLC                                                                           |
|--------------------------------------------|------------------------------------------------------------------------------------------------------------|------------------------------------------------------------------------------------------------------------|
| Instrument                                 | CAMAG TLC system (CAMAG, Muttenz, Switzerland)                                                             | CAMAG TLC system (CAMAG, Muttenz, Switzerland)                                                             |
| Software                                   | WinCAT's (version 1.4.3.6336, CAMAG, Muttenz, Switzerland)                                                 | WinCAT's (version 1.4.3.6336, CAMAG, Muttenz, Switzerland)                                                 |
| Syringe for sample application             | CAMAG microliter Syringe (Hamilton, Bonaduz, Switzerland)                                                  | CAMAG microliter Syringe (Hamilton, Bonaduz, Switzerland)                                                  |
| TLC plates/stationary phase                | 10 x 20 cm glass backed plates pre-coated with NP silica gel 60 F254S plates (E-Merck, Darmstadt, Germany) | 10 x 20 cm glass backed plates pre-coated with RP silica gel 60 F254S plates (E-Merck, Darmstadt, Germany) |
| Gas for sample application                 | Nitrogen                                                                                                   | Nitrogen                                                                                                   |
| Development chamber                        | CAMAG automatic developing chamber 2 (ADC2) (CAMAG, Muttenz, Switzerland)                                  | CAMAG automatic developing chamber 2 (ADC2) (CAMAG, Muttenz, Switzerland)                                  |
| Chamber saturation time                    | 30 min                                                                                                     | 30 min                                                                                                     |
| TLC Scanner                                | CAMAG TLC scanner-III (CAMAG, Muttenz, Switzerland)                                                        | CAMAG TLC scanner-III (CAMAG, Muttenz, Switzerland)                                                        |
| Mobile phase                               | Chloroform-methanol (90:10, $v v^{-1}$ )                                                                   | Ethanol-water (80:20, $v v^{-1}$ )                                                                         |
| Development distance on plate              | 80 mm                                                                                                      | 80 mm                                                                                                      |
| Development mode                           | Linear ascending mode                                                                                      | Linear ascending mode                                                                                      |
| Sample application rate                    | 150 nL s <sup>-1</sup>                                                                                     | 150 nL s <sup>-1</sup>                                                                                     |
| Densitometry of scanning mode              | Absorbance/reflectance                                                                                     | Absorbance/reflectance                                                                                     |
| Scanning wavelength of FBN                 | 302 nm                                                                                                     | 302 nm                                                                                                     |

**Table S2.** Results of instrumental precision for the routine normal-phase HPTLC and the sustainable reversed-phase HPTLC techniques (mean  $\pm$  SD; n = 6).

|                                | Area $\pm$ SD                    | Standard error | CV (%) |
|--------------------------------|----------------------------------|----------------|--------|
| Conc. (ng band <sup>-1</sup> ) |                                  |                |        |
| 150                            | Routine normal-phase HPTLC       |                |        |
|                                | 12745 $\pm$ 392                  | 160.06         | 3.07   |
| 500                            | Sustainable reversed-phase HPTLC |                |        |
|                                | 22122 $\pm$ 91                   | 37.15          | 0.41   |

**Table S3.** Results of robustness analysis by changing total run length for the routine normal-phase HPTLC and the sustainable reversed-phase HPTLC techniques (mean  $\pm$  SD; n = 6).

| Conc.<br>(ng band <sup>-1</sup> ) | Total run length (mm) |      |      | Results     |      |                |
|-----------------------------------|-----------------------|------|------|-------------|------|----------------|
|                                   | Original              | Used |      | Area ± SD   | % CV | R <sub>f</sub> |
| Routine normal-phase HPTLC        |                       |      |      |             |      |                |
| 150                               | 80                    | 82   | +2.0 | 11132 ± 276 | 2.47 | 0.60           |
|                                   |                       | 80   | 0.0  | 11862 ± 284 | 2.39 | 0.62           |
|                                   |                       | 78   | -2.0 | 12178 ± 299 | 2.42 | 0.65           |
| Sustainable reversed-phase HPTLC  |                       |      |      |             |      |                |
| Total run length (mm)             |                       |      |      |             |      |                |
| 500                               | 80                    | 82   | +2.0 | 23976 ± 106 | 0.44 | 0.58           |
|                                   |                       | 80   | 0.0  | 24132 ± 118 | 0.48 | 0.60           |
|                                   |                       | 78   | -2.0 | 24654 ± 122 | 0.49 | 0.62           |

**Table S4.** Results of robustness analysis by changing the saturation time for the routine normal-phase HPTLC and the sustainable reversed-phase HPTLC techniques (mean  $\pm$  SD; n = 6).

| Conc.<br>(ng band <sup>-1</sup> ) | Saturation time (min) |      |      | Results     |      |                |
|-----------------------------------|-----------------------|------|------|-------------|------|----------------|
|                                   | Original              | Used |      | Area ± SD   | % CV | R <sub>f</sub> |
| Routine normal-phase HPTLC        |                       |      |      |             |      |                |
| 150                               | 30                    | 32   | +2.0 | 10932 ± 264 | 2.41 | 0.61           |
|                                   |                       | 30   | 0.0  | 11221 ± 292 | 2.60 | 0.62           |
|                                   |                       | 28   | -2.0 | 12321 ± 303 | 2.45 | 0.63           |
| Sustainable reversed-phase HPTLC  |                       |      |      |             |      |                |
| Saturation time (min)             |                       |      |      |             |      |                |
| 500                               | 30                    | 32   | +2.0 | 22868 ± 107 | 0.46 | 0.58           |
|                                   |                       | 30   | 0.0  | 23243 ± 111 | 0.47 | 0.60           |
|                                   |                       | 28   | -2.0 | 24815 ± 117 | 0.47 | 0.61           |

**Table S5.** Results of robustness analysis by changing the detection wavelength for the routine normal-phase HPTLC and the sustainable reversed-phase HPTLC techniques (mean  $\pm$  SD; n = 6).

| Conc.<br>(ng band <sup>-1</sup> ) | Detection wavelength (nm) |      |      |             | Results |                |
|-----------------------------------|---------------------------|------|------|-------------|---------|----------------|
|                                   | Original                  | Used |      | Area ± SD   | % CV    | R <sub>f</sub> |
| Routine normal-phase HPTLC        |                           |      |      |             |         |                |
| 150                               | 302                       | 304  | +2.0 | 10122 ± 270 | 2.66    | 0.60           |
|                                   |                           | 302  | 0.0  | 12223 ± 275 | 2.24    | 0.62           |
|                                   |                           | 300  | -2.0 | 10766 ± 290 | 2.69    | 0.62           |
| Sustainable reversed-phase HPTLC  |                           |      |      |             |         |                |
| Detection wavelength (nm)         |                           |      |      |             |         |                |
| 500                               | 302                       | 304  | +2.0 | 21128 ± 121 | 0.57    | 0.58           |
|                                   |                           | 302  | 0.0  | 23892 ± 128 | 0.53    | 0.60           |
|                                   |                           | 300  | -2.0 | 22982 ± 132 | 0.57    | 0.60           |

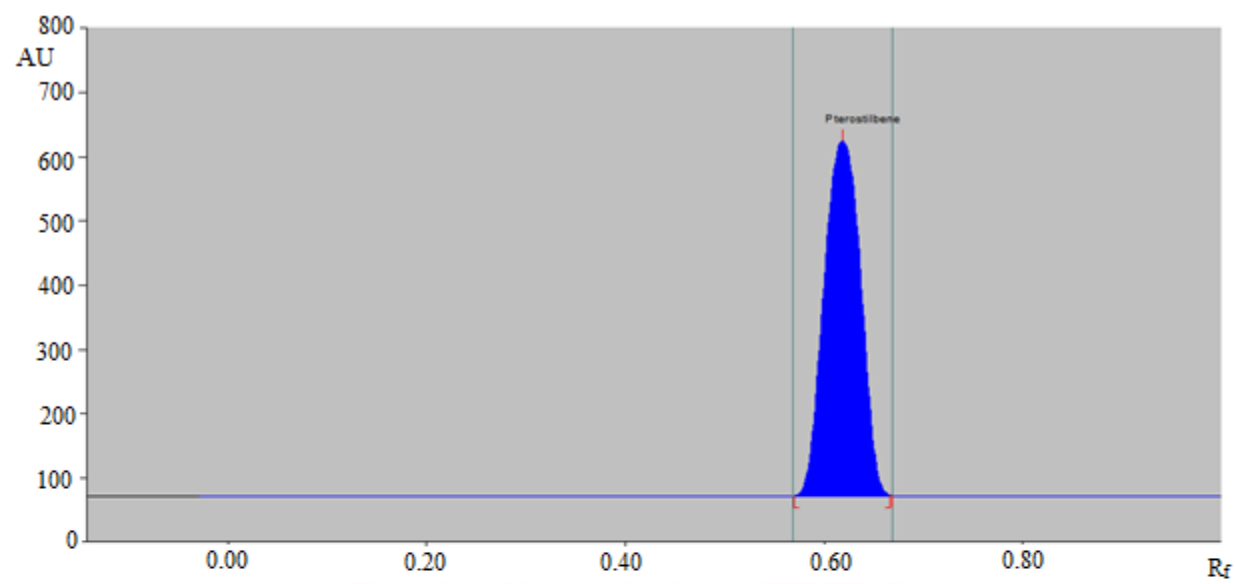

**Routine Normal-phase HPTLC**

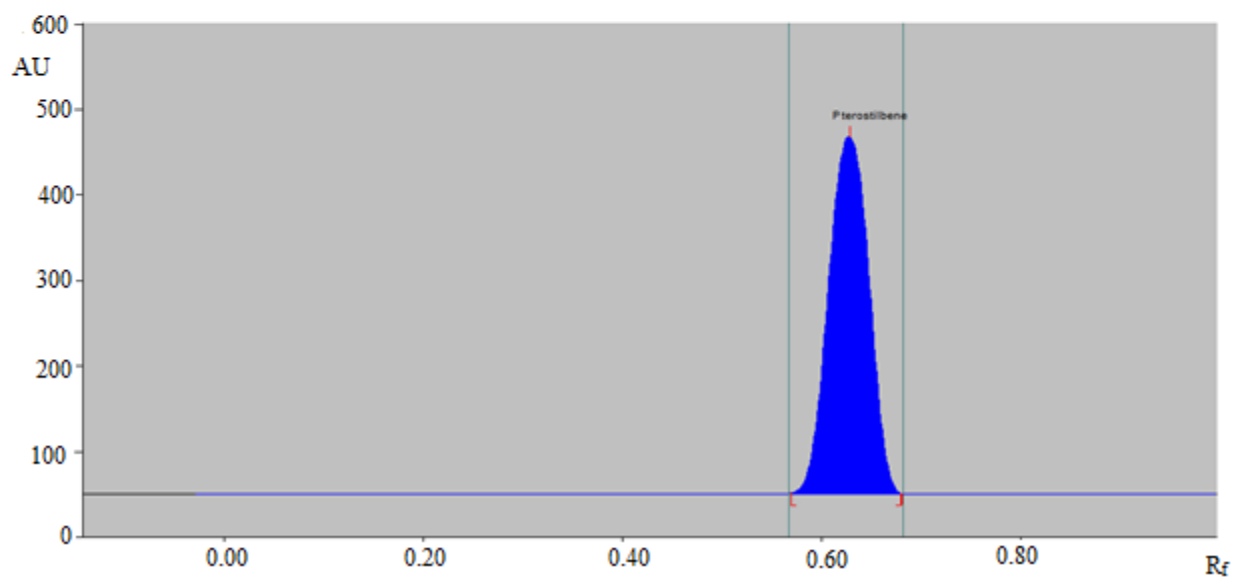

**Sustainable Reversed-phase HPTLC**

**Figure S1.** Representative chromatograms of PT in commercial formulation recorded using routine normal-phase HPTLC and sustainable reversed-phase HPTLC techniques.
